# Supplementary material
Source: Springer Nature journal article supplement (https://www.springermedizin.de/resource/supplementary/12963_2012_212_MOESM8_ESM.pdf/9572402)

By: Age Group

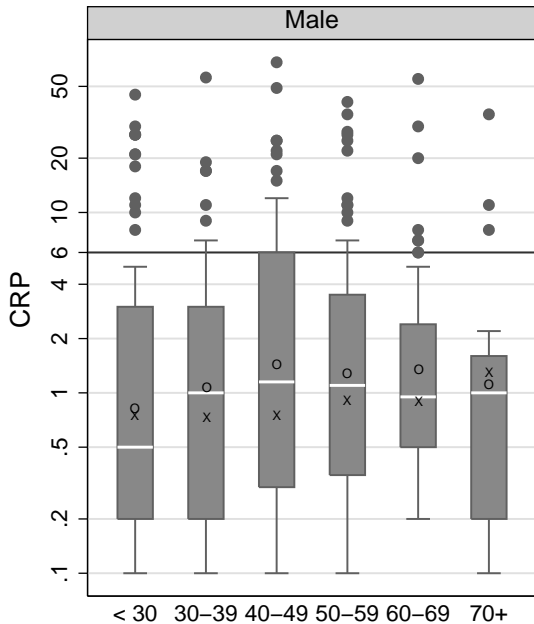

By: Age Group

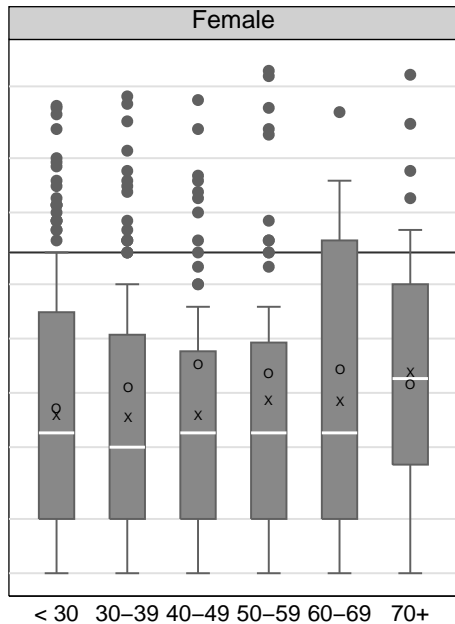

Supplement: MOESM8 [file 9572402]
